# Supplementary material
Source: publisher figshare collection journal article supplement (https://tandf.figshare.com/ndownloader/files/16340573)
Supplement: Supplementary file 1 [file 16340573]

**Appendix:** Asthma Question Prompt List

**Read these questions and put checks by the ones you want to ask the doctor.**

**Questions about asthma**

- What causes my asthma?
- How do I prevent breathing problems?
- Can you tell me what asthma triggers are?
- How can I make my asthma better?
- How severe is my asthma?
- What can I do if someone is smoking around me?
- When should I stay indoors?
- Can I be around my pet?

**Questions about asthma medicines:**

- What do you call my asthma medicine?
- What medicine do I use when my chest is tight or when I wheeze or cough?
- Which asthma medicine do I take every day and why?
- How do I use a spacer?
- When should I use my medicine?
- How much medicine should I take each time I use it?
- How long do I hold my breath after I inhale my medicine?
- Why do I hold my breath after I inhale my medicine?
- How many times a day do I take it?
- Should I use my asthma medicine before I play or exercise?
- Is it okay to take my asthma medicine with my other medicines?
- Can you show me how to use my medicine?
- Can I show or tell you how I use my medicine so you tell me if I am doing it right?
- Should I always carry my asthma medicine with me?

**Write any other questions you have in the space below:**

**_____________________________________________________________________________________________________________________**
